# Supplementary material for: Programming hierarchical anisotropy in microactuators for multimodal actuation
Source: Royal Society of Chemistry journal article supplement (doi:10.1039/d4lc00369a), 2024-01-01
Supplement: d4lc00369a2.pdf [file d4lc00369a2.pdf]

## Supplementary Information for

### **Programming hierarchical anisotropy in microactuators for multimodal actuation**

Shiyu Wang, Shucong Li, Wenchang Zhao, Ying Zhou, Liqiu Wang\*, Joanna Aizenberg\*,

Pingan Zhu\*

\*Corresponding author. Email: [liqiu.wang@polyu.edu.hk](mailto:liqiu.wang@polyu.edu.hk); [jaiz@seas.harvard.edu](mailto:jaiz@seas.harvard.edu);

[pingazhu@cityu.edu.hk](mailto:pingazhu@cityu.edu.hk)

### Note S1: Morphologies of LCE microparticles

Uniform LCE microparticles could be fabricated using the microfluidics-enabled soft manufacturing method by controlling the inner-phase flow rate  $Q_i = 0.3\text{-}0.8 \text{ mL h}^{-1}$  and outer-phase flow rate  $Q_o = 6\text{-}18 \text{ mL h}^{-1}$ . The oil droplets encapsulated in the hydrogel microfibers are subjected to a compressive force along the radial direction. Thus, the resulting microparticles adopt a slender anisotropic shape with the long axis (LA) in the microfibers' axial direction and the short axis (SA) in the microfibers' radial direction.

As shown in **Figure S4**, the morphology of LCE microparticles can be engineered by tuning both  $Q_i$  and  $Q_o$ . The volume of LCE microparticles increases with the increase of  $Q_i$  and decreases with the increase of  $Q_o$ . The generated LCE microparticles are uniform in morphology, because of the capability of precisely manipulating small volumes of fluids by microfluidics.

A constant load can be applied to stretch the microfibers along the axial direction during the drying process. As such, the templated LCE microparticles will also be stretched to have a higher aspect ratio (defined as the length ratio between the LA and the SA). In this case, the cross-section of LCE microparticles can also be anisotropic in shape, for which two principal SAs are defined (e.g., SA1 and SA2). We used the length ratio of SA1 to SA2 ( $\gamma$ ) to evaluate the cross-sectional anisotropy of the microparticles. Assuming that the length of SA1 is larger than that of SA2, we have  $\gamma > 1$ .

The influences of flow rates on the length of LA, SA1, and SA2 and the length ratio  $\gamma$  are shown in **Figure S6**. By keeping  $Q_o = 12 \text{ mL h}^{-1}$  and increasing  $Q_i$  from  $0.3 \text{ mL h}^{-1}$  to  $0.8 \text{ mL h}^{-1}$ , the length of LA increases while that of SA2 remains nearly constant and the length of SA1 increases slightly. **Figure S7a** shows that the shape of LCE microparticles gradually changes from rod to strip, with the transition occurring between  $Q_i = 0.6 \text{ mL h}^{-1}$  and  $Q_i = 0.7 \text{ mL h}^{-1}$ . In contrast,  $Q_o$  has the opposite effect to  $Q_i$  on

changing the morphology of LCE microparticles, as shown in **Figure S6b**. By keeping  $Q_i = 0.6 \text{ mL h}^{-1}$  and increasing  $Q_o$  from  $6 \text{ mL h}^{-1}$  to  $18 \text{ mL h}^{-1}$ , the length of LA decreases by  $\sim 320 \text{ }\mu\text{m}$  (**Figure S6d**).

## Supplementary Figures

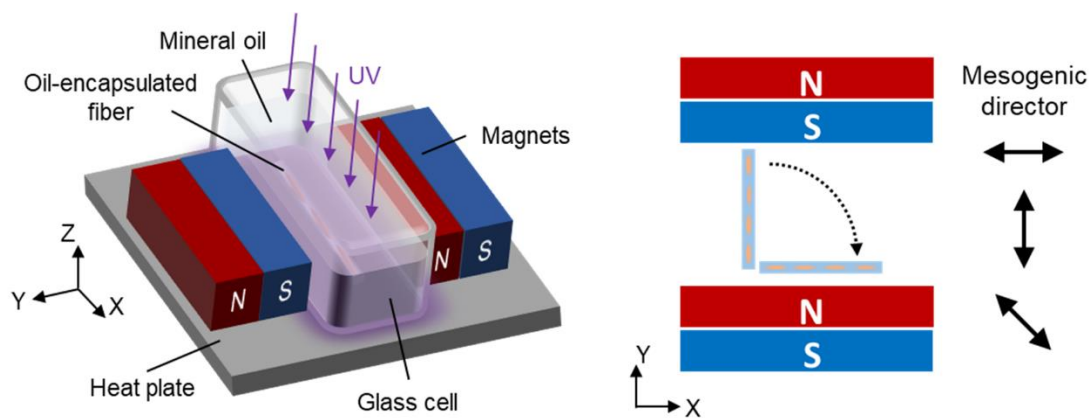

**Figure S1.** Schematic of the experimental setup for controlling the mesogenic director by a magnetic field during the polymerization.

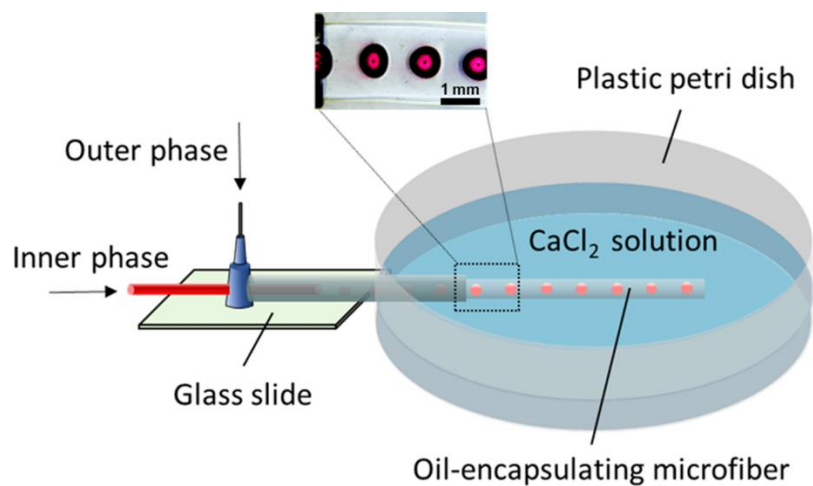

**Figure S2.** Schematic of the co-flow microfluidic device. Inset: micrograph showing the oil droplet array encapsulated in the hydrogel microfiber.

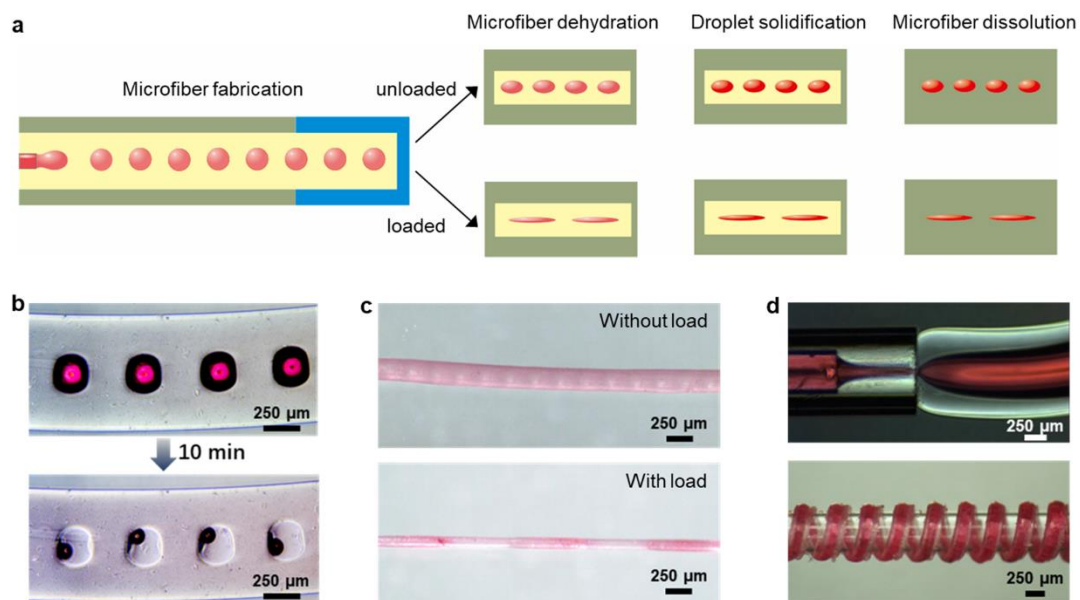

**Figure S3.** Microfiber-confined fabrication of LCE microstructures with anisotropic shapes. **a** Schematic of the four-step fabrication process: microfiber fabrication, microfiber dehydration, droplet solidification, and microfiber dissolution. **b** Optical images of the freshly prepared hydrogel microfiber (up) and the microfiber prepared after 10 mins (bottom). The evaporation of DCM leads to a reduction in the volume of the droplet and translates liquid droplets into solid particles. **c** Unloaded (up) and loaded (bottom) hydrogel microfibers after dehydration. **d** Optical images of an LCE jet encapsulated in a hydrogel microfiber (up) and an LCE microfiber wrapped around a glass capillary (bottom) for the preparation of helical LCE microfiber. The LCE is dyed red for better visualization in (b) to (d).

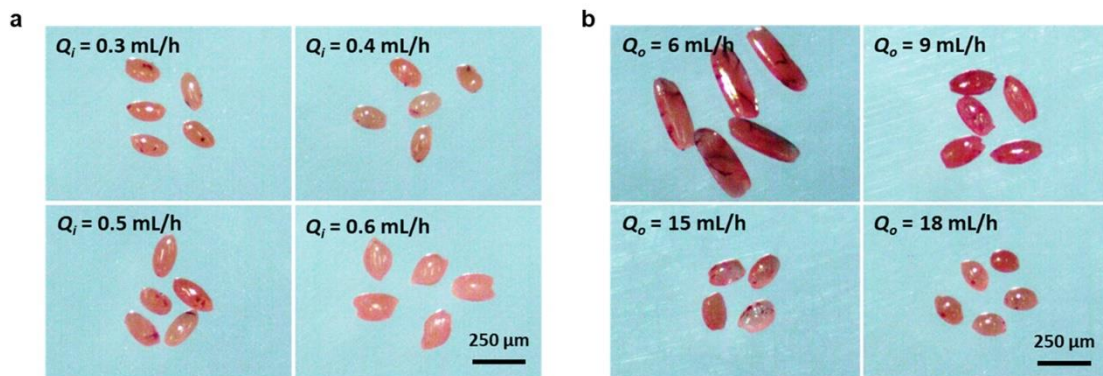

**Figure S4.** Morphologies of LCE microparticles templated from hydrogel microfibers. Optical images of LCE microparticles with varying flow rates of (a) the inner phase liquid  $Q_i$  ( $Q_o = 12 \text{ mL h}^{-1}$ ) and (b) the outer phase liquid  $Q_o$  ( $Q_i = 0.6 \text{ mL h}^{-1}$ ).

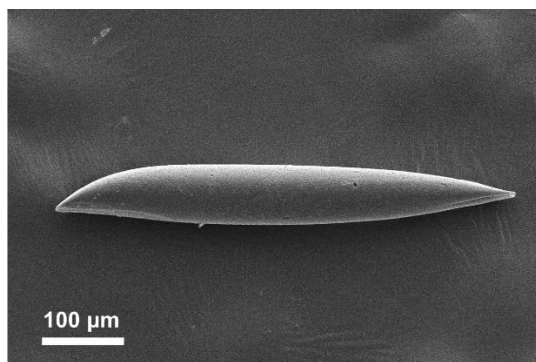

**Figure S5.** SEM image of the LCE micro-rod.



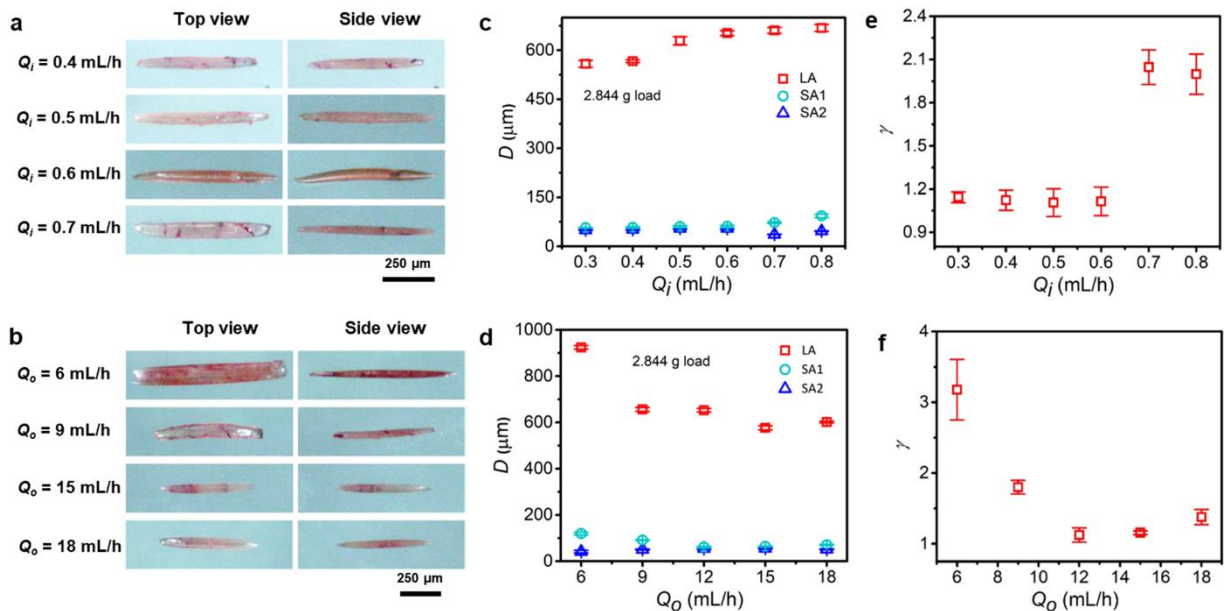

**Figure S6.** Controllable morphologies of LCE microparticles templated from hydrogel microfibers stretched by a load. The applied load is 2.844 g. **a** and **b** Optical images of LCE microparticles with varying flow rates of **(a)** the inner phase liquid  $Q_i$  ( $Q_o = 12$  mL h<sup>-1</sup>) and **(b)** the outer phase liquid  $Q_o$  ( $Q_i = 0.6$  mL h<sup>-1</sup>). **c** and **d** The length of the long axis (LA) and two principal short axes (PSA1 and PSA2), as controlled by varying **(c)**  $Q_i$  ( $Q_o = 12$  mL h<sup>-1</sup>) and **(d)**  $Q_o$  ( $Q_i = 0.6$  mL h<sup>-1</sup>). **e** and **f** The length ratio of the two principal axes  $\gamma$  controlled by varying **(e)**  $Q_i$  and **(f)**  $Q_o$ .

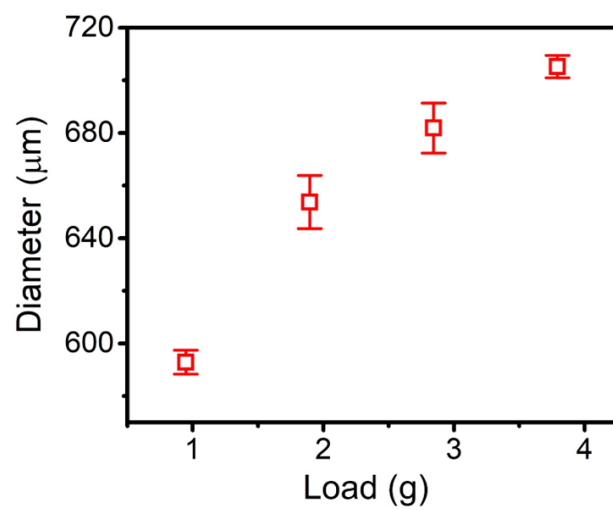

**Figure S7.** The length of LCE micro-rods versus the applied load.  $Q_o = 12 \text{ mL h}^{-1}$  and  $Q_i = 0.6 \text{ mL h}^{-1}$ .

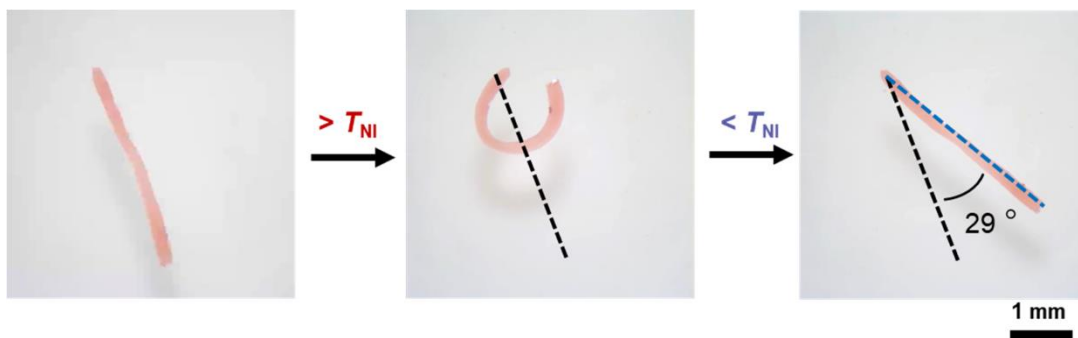

**Figure S8.** The rotational motion of an LCE micro-rod by large bending deformation undergoing a heating-cooling cycle. The black and blue dashed lines indicate the principal structural axis of the micro-rod before and after one cycle of bending actuation, respectively.

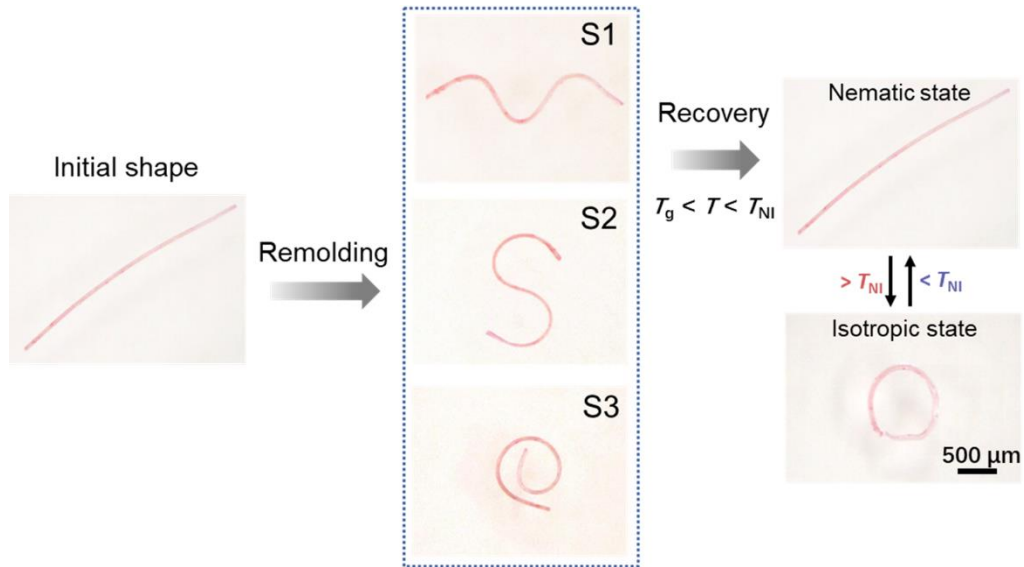

**Figure S9.** Programming temporary shapes of LCE microstructures by the shape memory effect. When the LCE is heated to a temperature  $T$  with  $T_g < T < T_{NI}$ , it can be temporarily remolded into arbitrary shapes (e.g., S1, S2, and S3) by external forces. The temporary shapes can be preserved by cooling until the structure is heated above  $T_g$  again.

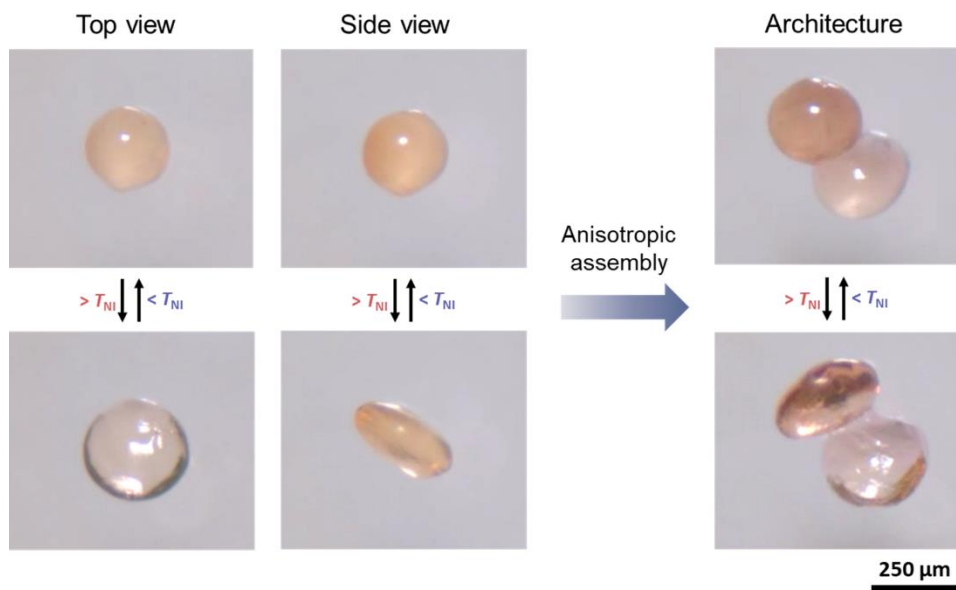

**Figure S10.** The anisotropic deformation by the assembly of isotropic LCE microspheres. Although LCE microspheres are isotropic in shape, the mesogenic alignment defines a well-controlled molecular anisotropy. The synergy between the molecular and architectural anisotropies leads to the anisotropic deformation of the assembled architecture. A variety of deformations can be further generated by varying the molecular or architectural anisotropy.

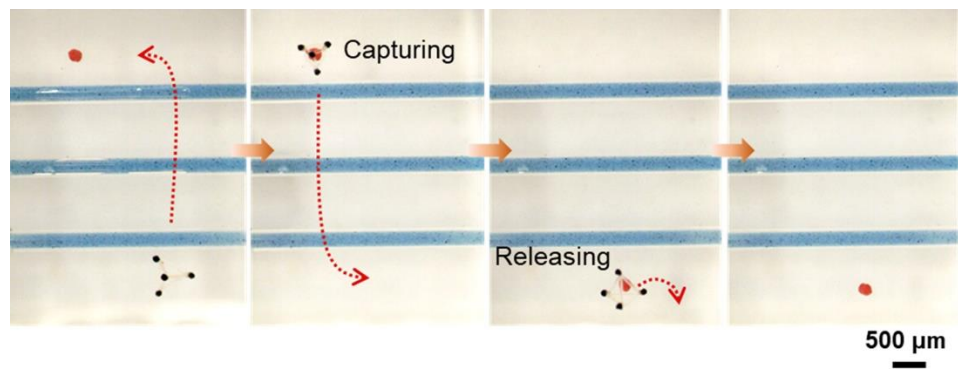

**Figure S11.** The tetrahedral microactuator capable of cargo transport over obstacles.
